# Supplementary material for: Sodium Alginate-Based MgO Nanoparticles Coupled Antibiotics as Safe and Effective Antimicrobial Candidates against Staphylococcus aureus of Houbara Bustard Birds
Source: MDPI journal article supplement (doi:10.3390/biomedicines11071959), 2023-07-11
Supplement: s1 [file s1]

**Table S1.** Summary of structural parameters obtained from XRD data.

| Parameters                          | Results                   |
|-------------------------------------|---------------------------|
| ICDD card #                         | 77-2364                   |
| Crystal system                      | Cubic                     |
| Space group                         | Fm-3 m                    |
| Space group no.                     | 225                       |
| No. of atoms in unit cell           | 27                        |
| <b>Cell parameters</b>              |                           |
| a                                   | 3.98300Å                  |
| <b>Atom coordinates</b>             |                           |
| x, y and z coordinates of Magnesium | 0.00, 0.00, 0.00          |
| x, y and z coordinates of Oxygen    | 0.50, 0.50, 0.50          |
| <b>Density</b>                      | 4.23700 g/cm <sup>3</sup> |
| <b>d spacing and hkl</b>            | 2.299 and (111)           |
|                                     | 1.9915 and (200)          |
|                                     | 1.408 and (220)           |
|                                     | 1.2009 and (311)          |
|                                     | 1.1498 and (222)          |

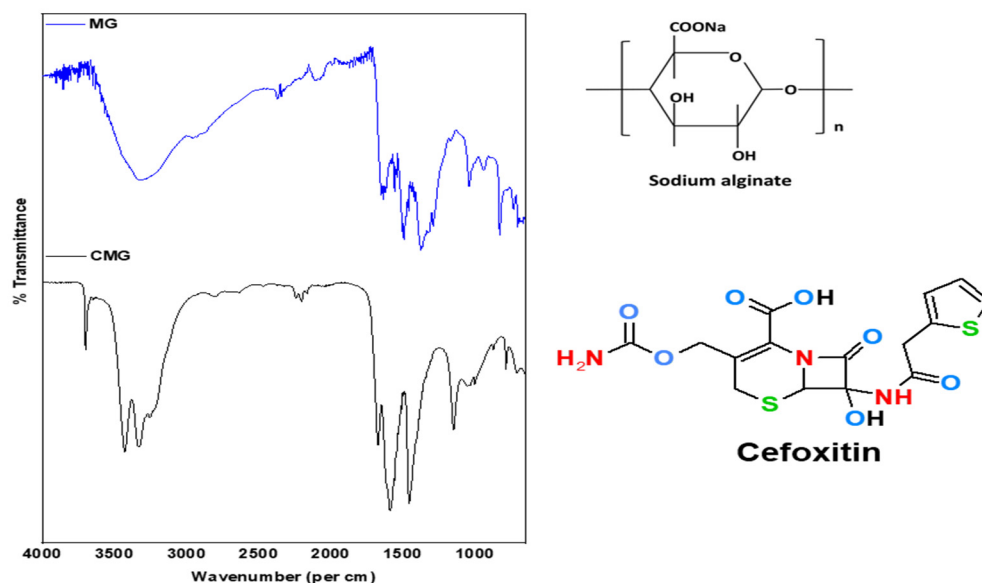

**Figure S1.** FTIR pattern of MG and GMC.

In Figure S1, strong bands are observed at 1500–1600 cm<sup>-1</sup> representing presence of carbonyl functional group in CMG. Due to presence of amine (NH<sub>2</sub> and NH) groups, two peaks are observed around 3300–3600 cm<sup>-1</sup>. In case of MG, amine groups are absent. Only hydroxyl groups are present. So a broad band is observed around 3300–3600 cm<sup>-1</sup>. MgO peaks are present before 1000 cm<sup>-1</sup>. Comparison of both patterns confirm that drug has been coated because characteristic peaks of amine are obtained.

**Table S2.** Risk factor analysis of *S. aureus* isolated from enteric source of Houbara bustard birds.

| Variable                    | Levels                      | Screened | Positive | Prevalence (%) | p-value | CI 95%      |             |
|-----------------------------|-----------------------------|----------|----------|----------------|---------|-------------|-------------|
|                             |                             |          |          |                |         | Lower ratio | Upper ratio |
| Gender                      | Male                        | 35       | 18       | 51.42          | 0.579   | 35.57       | 67.01       |
|                             | Female                      | 70       | 40       | 57.14          |         | 45.48       | 68.06       |
| Age                         | Up to 6 months              | 15       | 8        | 61.66          | 0.427   | 30.11       | 75.19       |
|                             | 7–12 month                  | 36       | 23       | 63.88          |         | 47.58       | 77.53       |
|                             | Above 1 years               | 54       | 27       | 50             |         | 37.11       | 62.89       |
| Housing system              | Open housing                | 67       | 33       | 49.25          | 0.102   | 37.65       | 60.93       |
|                             | Pen                         | 38       | 25       | 65.78          |         | 49.89       | 78.79       |
| Feeding system              | Poultry feed                | 38       | 11       | 28.95          | <0.01   | 17.01       | 44.76       |
|                             | Poultry feed plus Scavenger | 67       | 47       | 70.15          |         | 58.35       | 79.77       |
| Season                      | Spring                      | 40       | 25       | 6.25           | 0.114   | 47.03       | 75.78       |
|                             | Winter                      | 30       | 15       | 50             |         | 33.15       | 66.85       |
|                             | Summer                      | 35       | 18       | 51.42          |         | 35.57       | 67.01       |
| Gastro intestinal Parasites | Yes                         | 44       | 38       | 86.36          | <0.01   | 73.29       | 93.59       |
|                             | No                          | 61       | 20       | 32.78          |         | 22.34       | 45.28       |
| Exposure of antibiotics     | Frequent                    | 25       | 21       | 84             | <0.01   | 65.35       | 93.6        |
|                             | Occasional                  | 30       | 22       | 73.33          |         | 55.55       | 85.81       |
|                             | No use                      | 50       | 15       | 30             |         | 19.1        | 43.75       |
| Type of antibiotic used     | Beta-lactam                 | 50       | 39       | 78             | <0.01   | 19.1        | 43.75       |
|                             | Other                       | 10       | 4        | 40             |         | 16.82       | 68.73       |
|                             | NA                          | 50       | 15       | 30             |         | 19.1        | 43.75       |

$p < 0.05$  indicate significant association, MMS = Methyl methanesulphonate.

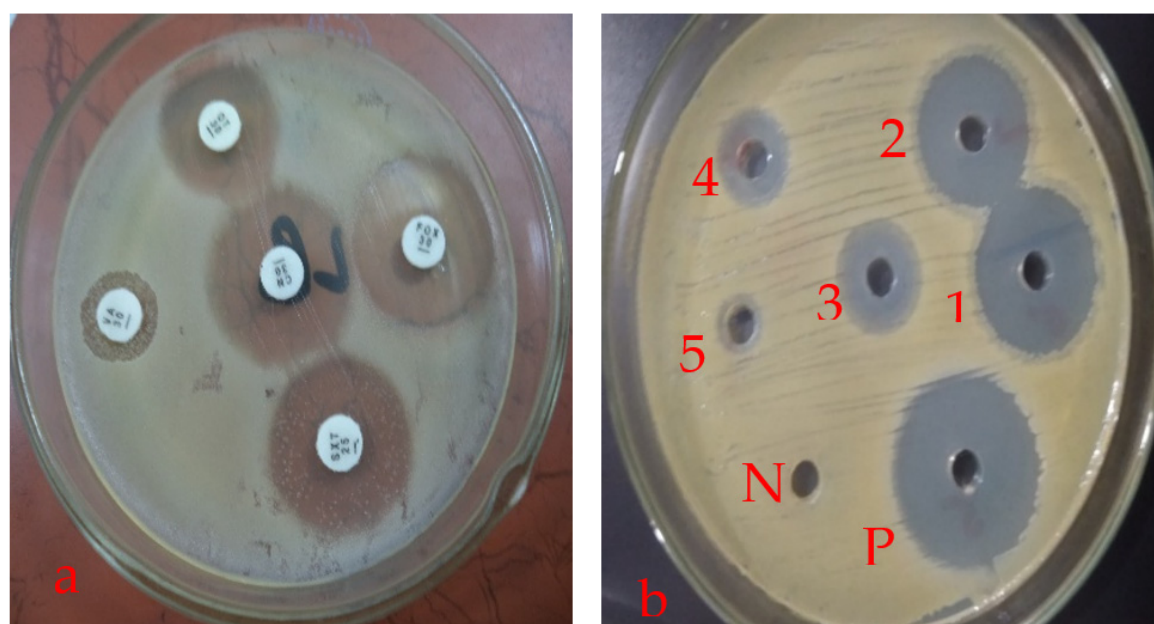

**Figure S2.** Antibacterial activity by disc diffusion and well diffusion method (a) for antibiotic susceptibility and well diffusion method (b) for nanocomposites against *S. aureus*. *n* = negative control, *P* = positive control, 1–5 = nanocomposite preparations.
